# Supplementary material for: The effect of a low-carbohydrate, ketogenic diet versus a low-glycemic index diet on glycemic control in type 2 diabetes mellitus
Source: Springer Nature journal article supplement (doi:10.1186/1743-7075-5-36), 2008-12-01
Supplement: 12986_2008_160_MOESM1_ESM.pdf [file 12986_2008_160_MOESM1_ESM.pdf]

|      | LCKD   |      |      |      |      |      |      |      |      |      |      |      |      |      |      |      |      |      |      |      |      | MEAN    |
|------|--------|------|------|------|------|------|------|------|------|------|------|------|------|------|------|------|------|------|------|------|------|---------|
| %    | 1.4    | 0.9  | 0    | 0    | -0.1 | -0.3 | -0.6 | -0.7 | -0.9 | -1.1 | -1.1 | -1.4 | -1.4 | -1.7 | -1.7 | -2.2 | -3.5 | -3.6 | -4.1 | -4.6 | -4.9 | -1.5048 |
| 1.9  | 0.5    | 1    | 1.9  | 1.9  | 2    | 2.2  | 2.5  | 2.6  | 2.8  | 3    | 3    | 3.3  | 3.3  | 3.6  | 3.6  | 4.1  | 5.4  | 5.5  | 6    | 6.5  | 6.8  |         |
| 1.2  | -0.2   | 0.3  | 1.2  | 1.2  | 1.3  | 1.5  | 1.8  | 1.9  | 2.1  | 2.3  | 2.3  | 2.6  | 2.6  | 2.9  | 2.9  | 3.4  | 4.7  | 4.8  | 5.3  | 5.8  | 6.1  |         |
| 1.2  | -0.2   | 0.3  | 1.2  | 1.2  | 1.3  | 1.5  | 1.8  | 1.9  | 2.1  | 2.3  | 2.3  | 2.6  | 2.6  | 2.9  | 2.9  | 3.4  | 4.7  | 4.8  | 5.3  | 5.8  | 6.1  |         |
| 1.1  | -0.3   | 0.2  | 1.1  | 1.1  | 1.2  | 1.4  | 1.7  | 1.8  | 2    | 2.2  | 2.2  | 2.5  | 2.5  | 2.8  | 2.8  | 3.3  | 4.6  | 4.7  | 5.2  | 5.7  | 6    |         |
| 1.1  | -0.3   | 0.2  | 1.1  | 1.1  | 1.2  | 1.4  | 1.7  | 1.8  | 2    | 2.2  | 2.2  | 2.5  | 2.5  | 2.8  | 2.8  | 3.3  | 4.6  | 4.7  | 5.2  | 5.7  | 6    |         |
| 0.7  | -0.7   | -0.2 | 0.7  | 0.7  | 0.8  | 1    | 1.3  | 1.4  | 1.6  | 1.8  | 1.8  | 2.1  | 2.1  | 2.4  | 2.4  | 2.9  | 4.2  | 4.3  | 4.8  | 5.3  | 5.6  |         |
| 0.5  | -0.9   | -0.4 | 0.5  | 0.5  | 0.6  | 0.8  | 1.1  | 1.2  | 1.4  | 1.6  | 1.6  | 1.9  | 1.9  | 2.2  | 2.2  | 2.7  | 4    | 4.1  | 4.6  | 5.1  | 5.4  |         |
| 0.5  | -0.9   | -0.4 | 0.5  | 0.5  | 0.6  | 0.8  | 1.1  | 1.2  | 1.4  | 1.6  | 1.6  | 1.9  | 1.9  | 2.2  | 2.2  | 2.7  | 4    | 4.1  | 4.6  | 5.1  | 5.4  |         |
| 0.4  | -1     | -0.5 | 0.4  | 0.4  | 0.5  | 0.7  | 1    | 1.1  | 1.3  | 1.5  | 1.5  | 1.8  | 1.8  | 2.1  | 2.1  | 2.6  | 3.9  | 4    | 4.5  | 5    | 5.3  |         |
| 0.4  | -1     | -0.5 | 0.4  | 0.4  | 0.5  | 0.7  | 1    | 1.1  | 1.3  | 1.5  | 1.5  | 1.8  | 1.8  | 2.1  | 2.1  | 2.6  | 3.9  | 4    | 4.5  | 5    | 5.3  |         |
| 0.3  | -1.1   | -0.6 | 0.3  | 0.3  | 0.4  | 0.6  | 0.9  | 1    | 1.2  | 1.4  | 1.4  | 1.7  | 1.7  | 2    | 2    | 2.5  | 3.8  | 3.9  | 4.4  | 4.9  | 5.2  |         |
| -0.2 | -1.6   | -1.1 | -0.2 | -0.2 | -0.1 | 0.1  | 0.4  | 0.5  | 0.7  | 0.9  | 0.9  | 1.2  | 1.2  | 1.5  | 1.5  | 2    | 3.3  | 3.4  | 3.9  | 4.4  | 4.7  |         |
| -0.3 | -1.7   | -1.2 | -0.3 | -0.3 | -0.2 | 0    | 0.3  | 0.4  | 0.6  | 0.8  | 0.8  | 1.1  | 1.1  | 1.4  | 1.4  | 1.9  | 3.2  | 3.3  | 3.8  | 4.3  | 4.6  |         |
| -0.3 | -1.7   | -1.2 | -0.3 | -0.3 | -0.2 | 0    | 0.3  | 0.4  | 0.6  | 0.8  | 0.8  | 1.1  | 1.1  | 1.4  | 1.4  | 1.9  | 3.2  | 3.3  | 3.8  | 4.3  | 4.6  |         |
| -0.4 | -1.8   | -1.3 | -0.4 | -0.4 | -0.3 | -0.1 | 0.2  | 0.3  | 0.5  | 0.7  | 0.7  | 1    | 1    | 1.3  | 1.3  | 1.8  | 3.1  | 3.2  | 3.7  | 4.2  | 4.5  |         |
| -0.5 | -1.9   | -1.4 | -0.5 | -0.5 | -0.4 | -0.2 | 0.1  | 0.2  | 0.4  | 0.6  | 0.6  | 0.9  | 0.9  | 1.2  | 1.2  | 1.7  | 3    | 3.1  | 3.6  | 4.1  | 4.4  |         |
| -0.5 | -1.9   | -1.4 | -0.5 | -0.5 | -0.4 | -0.2 | 0.1  | 0.2  | 0.4  | 0.6  | 0.6  | 0.9  | 0.9  | 1.2  | 1.2  | 1.7  | 3    | 3.1  | 3.6  | 4.1  | 4.4  |         |
| -0.5 | -1.9   | -1.4 | -0.5 | -0.5 | -0.4 | -0.2 | 0.1  | 0.2  | 0.4  | 0.6  | 0.6  | 0.9  | 0.9  | 1.2  | 1.2  | 1.7  | 3    | 3.1  | 3.6  | 4.1  | 4.4  |         |
| -0.7 | -2.1   | -1.6 | -0.7 | -0.7 | -0.6 | -0.4 | -0.1 | 0    | 0.2  | 0.4  | 0.4  | 0.7  | 0.7  | 1    | 1    | 1.5  | 2.8  | 2.9  | 3.4  | 3.9  | 4.2  |         |
| -0.7 | -2.1   | -1.6 | -0.7 | -0.7 | -0.6 | -0.4 | -0.1 | 0    | 0.2  | 0.4  | 0.4  | 0.7  | 0.7  | 1    | 1    | 1.5  | 2.8  | 2.9  | 3.4  | 3.9  | 4.2  |         |
| -0.8 | -2.2   | -1.7 | -0.8 | -0.8 | -0.7 | -0.5 | -0.2 | -0.1 | 0.1  | 0.3  | 0.3  | 0.6  | 0.6  | 0.9  | 0.9  | 1.4  | 2.7  | 2.8  | 3.3  | 3.8  | 4.1  |         |
| -0.9 | -2.3   | -1.8 | -0.9 | -0.9 | -0.8 | -0.6 | -0.3 | -0.2 | 0    | 0.2  | 0.2  | 0.5  | 0.5  | 0.8  | 0.8  | 1.3  | 2.6  | 2.7  | 3.2  | 3.7  | 4    |         |
| -0.9 | -2.3   | -1.8 | -0.9 | -0.9 | -0.8 | -0.6 | -0.3 | -0.2 | 0    | 0.2  | 0.2  | 0.5  | 0.5  | 0.8  | 0.8  | 1.3  | 2.6  | 2.7  | 3.2  | 3.7  | 4    |         |
| -1.1 | -2.5   | -2   | -1.1 | -1.1 | -1   | -0.8 | -0.5 | -0.4 | -0.2 | 0    | 0    | 0.3  | 0.3  | 0.6  | 0.6  | 1.1  | 2.4  | 2.5  | 3    | 3.5  | 3.8  |         |
| -1.6 | -3     | -2.5 | -1.6 | -1.6 | -1.5 | -1.3 | -1   | -0.9 | -0.7 | -0.5 | -0.5 | -0.2 | -0.2 | 0.1  | 0.1  | 0.6  | 1.9  | 2    | 2.5  | 3    | 3.3  |         |
| -1.7 | -3.1   | -2.6 | -1.7 | -1.7 | -1.6 | -1.4 | -1.1 | -1   | -0.8 | -0.6 | -0.6 | -0.3 | -0.3 | 0    | 0    | 0.5  | 1.8  | 1.9  | 2.4  | 2.9  | 3.2  |         |
| -3   | -4.4   | -3.9 | -3   | -3   | -2.9 | -2.7 | -2.4 | -2.3 | -2.1 | -1.9 | -1.9 | -1.6 | -1.6 | -1.3 | -1.3 | -0.8 | 0.5  | 0.6  | 1.1  | 1.6  | 1.9  |         |
| -3.8 | -5.2   | -4.7 | -3.8 | -3.8 | -3.7 | -3.5 | -3.2 | -3.1 | -2.9 | -2.7 | -2.7 | -2.4 | -2.4 | -2.1 | -2.1 | -1.6 | -0.3 | -0.2 | 0.3  | 0.8  | 1.1  |         |
| -5   | -6.4   | -5.9 | -5   | -5   | -4.9 | -4.7 | -4.4 | -4.3 | -4.1 | -3.9 | -3.9 | -3.6 | -3.6 | -3.3 | -3.3 | -2.8 | -1.5 | -1.4 | -0.9 | -0.4 | -0.1 |         |
| MEAN | -0.469 |      |      |      |      |      |      |      |      |      |      |      |      |      |      |      |      |      |      |      |      |         |

| LGI - LCKD   | n   | Prob Overall |
|--------------|-----|--------------|
| > 4.0        | 71  | 0.1117       |
| 2.0 to 4.0   | 120 | 0.197        |
| 0 - 2.0      | 225 | 0.369        |
| 0.0          | 10  | 0.016        |
| - 2.0 to 0   | 132 | 0.217        |
| -2.0 to -4.0 | 39  | 0.064        |
| < - 4.0      | 12  | 0.02         |

0.683

0.3
