# Supplementary figures and images for: The effect of a low-carbohydrate, ketogenic diet versus a low-glycemic index diet on glycemic control in type 2 diabetes mellitus
Source: Springer Nature journal article supplement (doi:10.1186/1743-7075-5-36), 2008-12-01

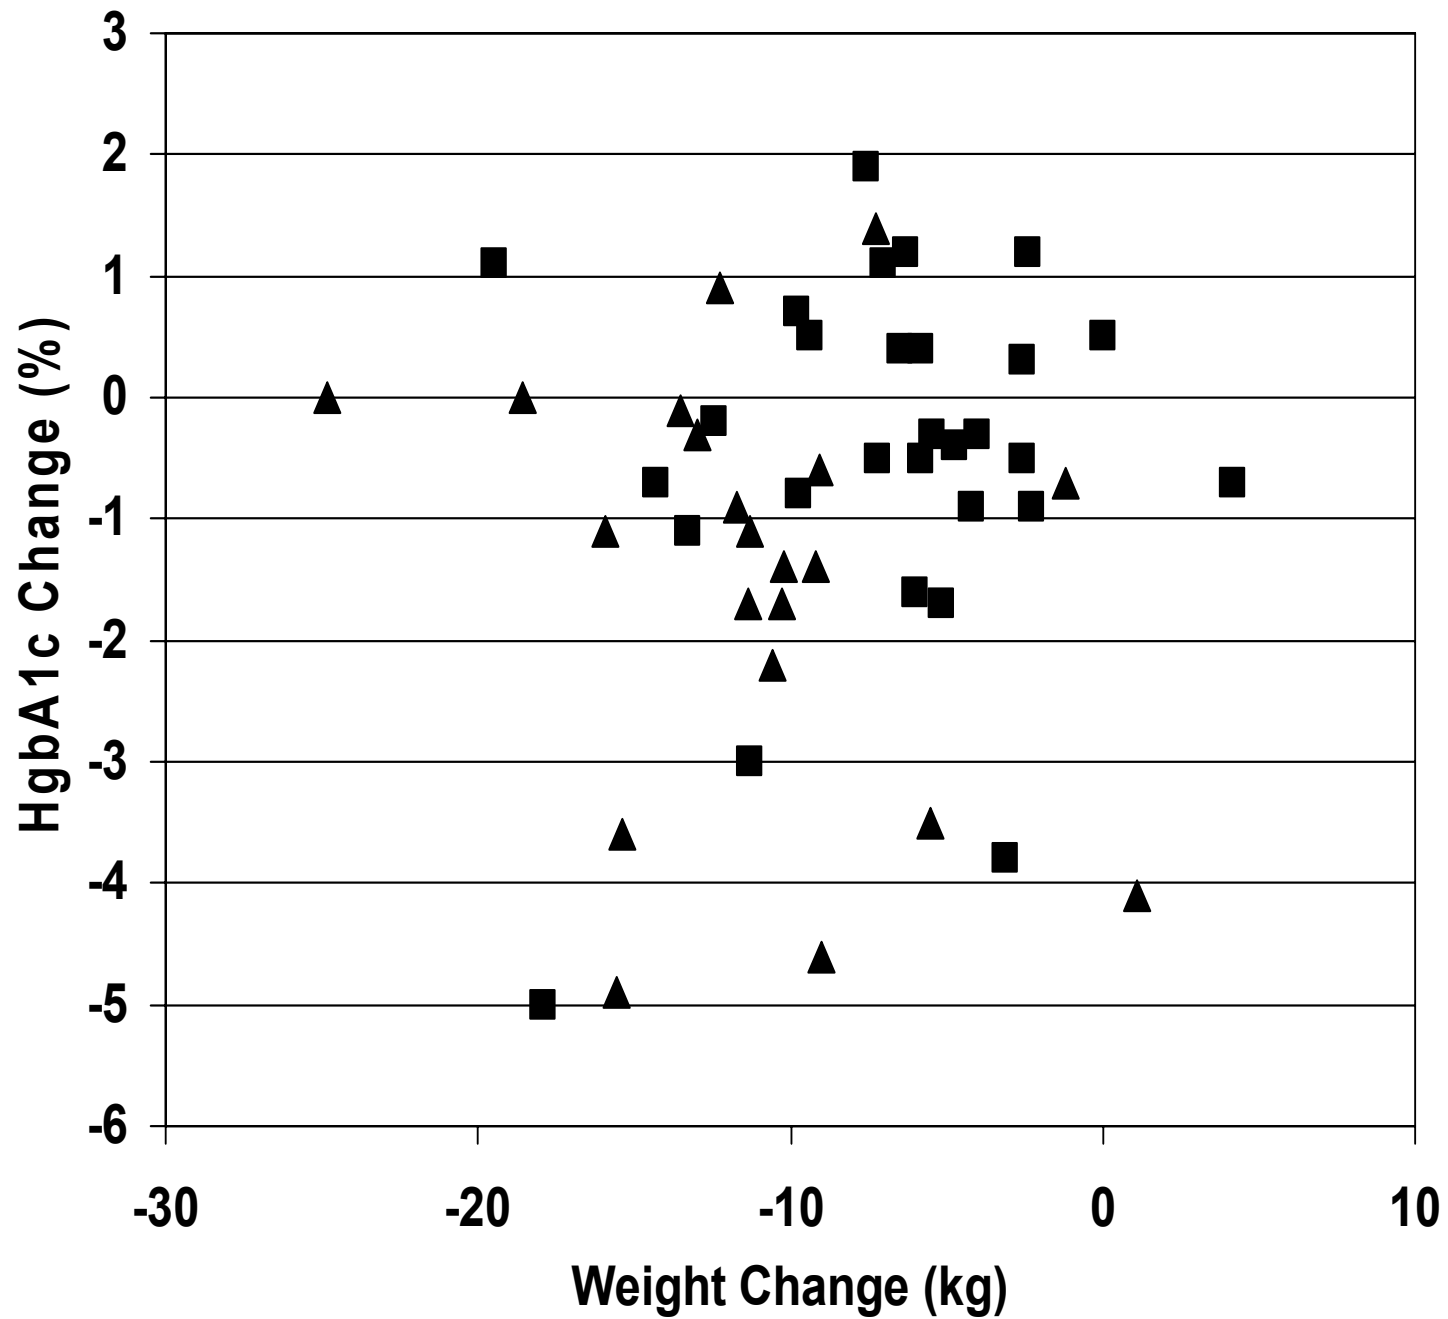

Supplement: 12986_2008_160_MOESM2_ESM.pdf [file 12986_2008_160_MOESM2_ESM.pdf]
